# Supplementary material for: Inhibition of Stat3 signaling ameliorates atrophy of the soleus muscles in mice lacking the vitamin D receptor
Source: PubMed Central journal article supplement (PMC5264327; doi:10.1186/s13395-017-0121-2), 2017-01-25

**Figure S3**

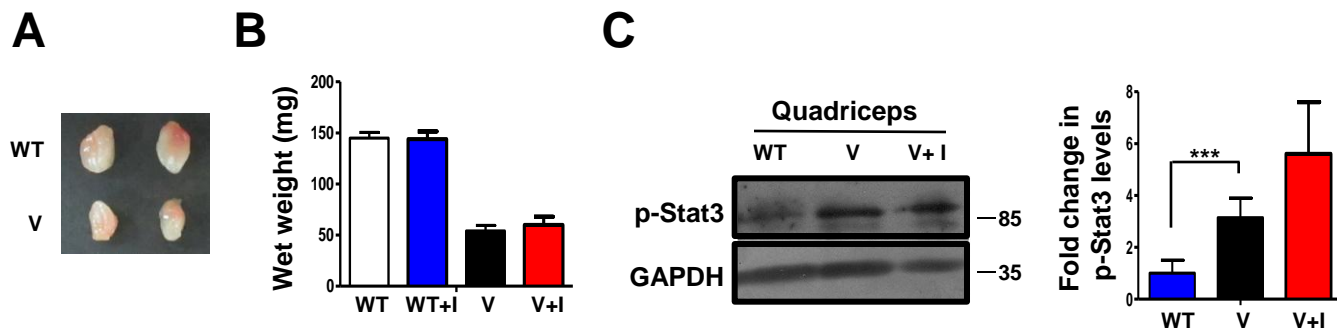

Supplement: 13395_2017_121_MOESM3_ESM.pdf [file 13395_2017_121_MOESM3_ESM.pdf]
